# Supplementary material
Source: Springer Nature journal article supplement (https://www.springermedizin.de/resource/supplementary/12889_2001_17_MOESM3_ESM.pdf/9484264)

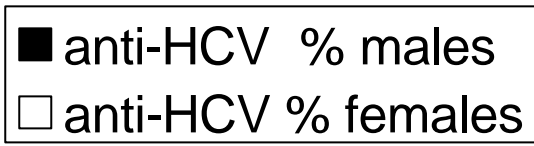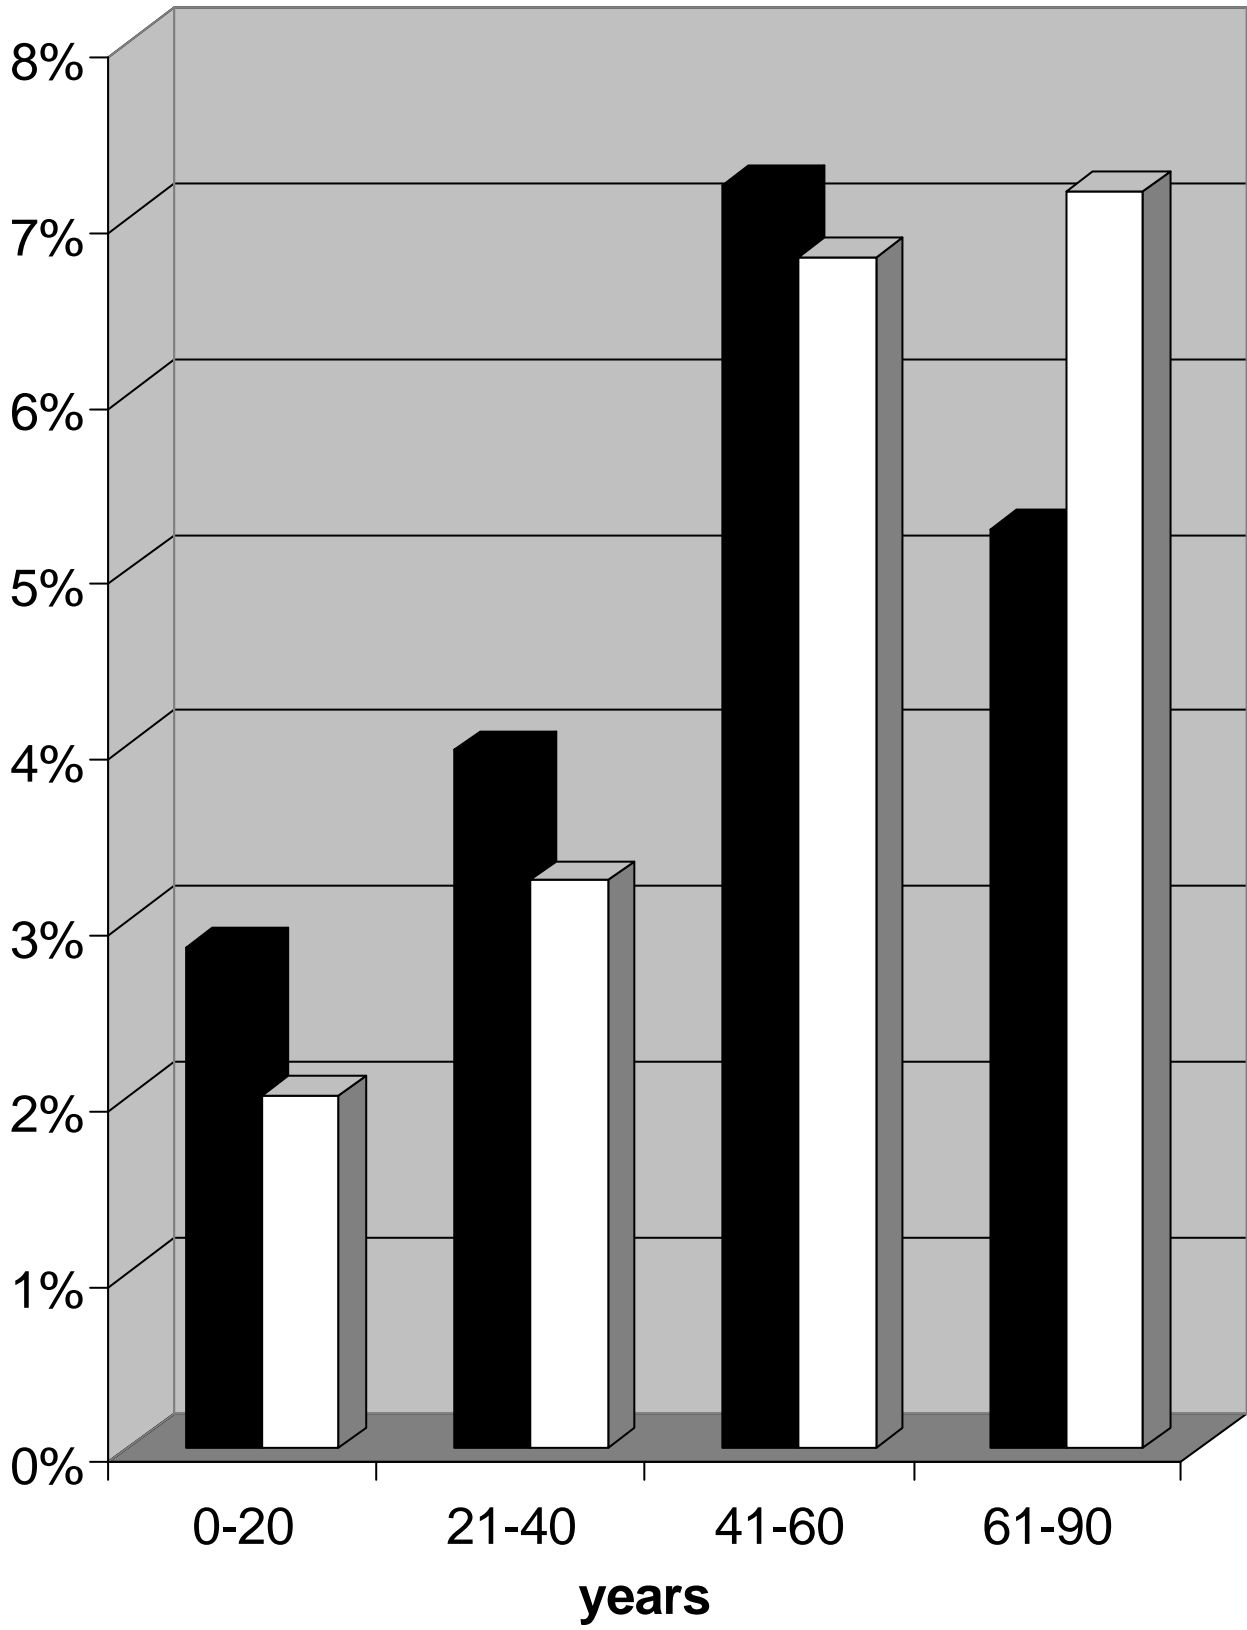

Supplement: MOESM3 [file 9484264]
